# Supplementary material
Source: Royal Society of Chemistry journal article supplement (doi:10.1039/d6gc01067a)
Supplement: d6gc01067a1.xlsx [file d6gc01067a1.xlsx]

## Sheet: Sheet1
Supplementary Table S1. Pseudomonas species used for genome-wide screening and comparative analysis of lignin degradation–related genes (hyperlink)
NCBI Genome Assembly characteristics							Quality analysis Software(CheckM v1.2.4)
Species	Strain	GenBank Accession	Assembly level	Genome size (Mb)	Number of Contigs	GC percent	Completeness%	Contamination%
Candidatus Pseudomonas adelgestsugas	HWA_ENA	GCA_004124255.1	Complete Genome	1.81	1	39.5	45.63	0.32
Pseudomonas abietaniphila	ATCC 700689	GCA_900100795.1	Contig	7.2	54	59.5	99.9	1.52
Pseudomonas abyssi	V113	GCA_003444685.1	Scaffold	4.2	65	61.5	91.78	1.79
Pseudomonas aegrilactucae	MAFF 301350	GCA_019168305.1	Contig	5.7	187	63.5	96.26	0.81
Pseudomonas aeruginosa	PAO1	GCA_000006765.1	Complete Genome	6.3	1	66.5	99.61	0.49
Pseudomonas agarici	NCPPB 2472	GCA_001543125.1	Chromosome	5.5	67	59	99.68	0.76
Pseudomonas agronomica	SAICEU22T	GCA_025917275.1	Contig	6.2	1203	61	98.73	0.88
Pseudomonas akapageensis	PS24	GCA_011355085.1	Scaffold	6.4	100	60	99.68	0.72
AquiPseudomonas alcaligenes	NEB 585	GCA_001597285.1	Complete Genome	4.4	1	65.5	98.34	0.11
Pseudomonas alcaliphila	ATCC BAA-571	GCA_033842905.1	Contig	5.4	2	63	99.83	0.48
Pseudomonas alkylphenolica	Neo	GCA_009755645.1	Complete Genome	5.6	1	61	99.29	0.96
Pseudomonas allii	7b	GCA_031588425.1	Contig	6.6	34	61	100	0.72
Pseudomonas alliivorans	20GA0068	GCA_017826695.1	Contig	5.8	31	59	100	0.25
Pseudomonas allokribbensis	IzPS23	GCA_014863605.1	Complete Genome	6.6	1	60.5	99.68	0.08
Pseudomonas alloputida	NMI24_14	GCA_021283545.2	Complete Genome	6.4	1	61.5	99.62	0.45
Pseudomonas alvandae	SWRI17	GCA_019141525.1	Complete Genome	6.3	1	61	99.68	0.08
Pseudomonas amygdali	ATCC 11528	GCA_000145945.2	Complete Genome	6.2	1	58	100	0.4
Pseudomonas anatoliensis	P141	GCA_017976235.1	Scaffold	6.2	22	59	99.25	0.4
Pseudomonas anguilliseptica	DSM 12111	GCA_900105355.1	Contig	5.2	3	60	97.51	0.26
Pseudomonas antarctica	LMG 22709	GCA_900103795.1	Chromosome	6.4	1	59.5	99.2	0.71
Pseudomonas anuradhapurensis	RD8MR3	GCA_014269225.2	Complete Genome	5.4	1	63.5	99.96	0.14
Pseudomonas arcuscaelestis	P66	GCA_016881005.1	Scaffold	6.3	90	58.5	99.29	4.11
Pseudomonas argentinensis	LMG 22563	GCA_900113905.1	Scaffold	5.1	17	63.5	100	0.43
Pseudomonas aromaticivorans	MAP12	GCA_019097855.1	Contig	4.4	89	66	95.5	2.18
Pseudomonas arsenicoxydans	CECT 7543	GCA_900103875.1	Chromosome	4.5	1	58.5	99.68	0.43
Pseudomonas asgharzadehiana	SWRI132	GCA_019139815.1	Complete Genome	6.1	1	60.5	100	0.4
Pseudomonas asiatica	Teo6	GCA_034358925.1	Complete Genome	6.1	1	62.5	100	0.27
Pseudomonas asplenii	ATCC 23835	GCA_900105475.1	Chromosome	6.5	1	61	99.96	0.78
Pseudomonas asturiensis	LMG 26898	GCA_900143095.1	Scaffold	59	56	6.2	99.68	0.57
Pseudomonas asuensis	JCM 13501	GCA_014646755.1	Scaffold	5.4	114	53.5	98.38	1.36
Pseudomonas atacamensis	SM1	GCA_017167965.1	Complete Genome	6	2	60	99.63	0.08
Pseudomonas atagonensis	PS14	GCA_011369485.1	Scaffold	6.1	85	59.5	99.68	0.48
Pseudomonas avellanae	CC1416	GCA_000452845.2	Contig	5.9	336	59	99.54	3.18
Pseudomonas aylmerensis	S1E40	GCA_001702265.1	Contig	7	49	61.5	100	3.13
Pseudomonas azadiae	SWRI103	GCA_019145355.1	Contig	6.1	3	60.5	100	0.51
Pseudomonas azerbaijanoccidentalis	SWRI74	GCA_019145495.1	Contig	6.7	29	59.5	99.36	0.43
Pseudomonas azerbaijanorientalis	SWRI123	GCA_019139795.1	Complete Genome	6.2	6.2	60	99.68	0.4
Pseudomonas azotoformans	LMG 21611	GCA_900103345.1	Chromosome	6.7	1	61	99.84	0.72
Pseudomonas baetica	LMG 25716	GCA_002813455.1	Contig	6.9	1	59	99.36	0.72
Pseudomonas baltica	MBT-2	GCA_014235765.1	Contig	4.6	28	62.5	98.59	0.11
Pseudomonas bananamidigenes	BW11P2	GCA_001679645.1	Contig	130	130	60.5	97.79	0.19
Pseudomonas batumici	Koz11	GCA_036585405.1	Complete Genome	6.8	1	61.5	97.46	0.86
Pseudomonas benzenivorans	HNIBRBA3361	GCA_033547155.1	Complete Genome	4.5	1	66	98.85	167
Pseudomonas benzopyrenica	MLY92	GCA_036884265.1	Complete Genome	5.1	1	65.5	98.4	0.53
Pseudomonas bharatica	HB/4285	GCA_048586865.1	Contig	6	67	63.5	99.6	0.65
Pseudomonas bijieensis	SP1	GCA_023330585.1	Complete Genome	6.7	1	61	99.95	0.48
Pseudomonas boanensis	L337	GCA_042232855.1	Complete Genome	5.7	1	62.5	100	1.43
Pseudomonas bohemica	IA19	GCA_002934685.1	Scaffold	6.5	183	59.5	99.17	1.07
Pseudomonas borbori	DSM 17834	GCA_900115555.1	Scaffold	5.3	100	63	98.95	1.2
Pseudomonas botevensis	COW3	GCA_019145475.1	Contig	6.4	55	61	99.57	0.08
Pseudomonas brassicacearum	3Re2-7	GCA_008370715.1	Complete Genome	6.7	1	61	96.75	1.64
Pseudomonas brassicae	MAFF 212427	GCA_010671725.1	Contig	5.5	655	63.5	73.49	0.46
Pseudomonas brenneri	DSM 15294	GCA_007858285.1	Contig	6	31	60	100	0.83
Pseudomonas bubulae	ML3-2023-1	GCA_037023725.1	Complete Genome	5.3	3	58	99.73	0.25
Pseudomonas californiensis	CDFA601	GCA_021147775.1	Contig	6.3	147	58	99.65	0.77
Pseudomonas campi	S1-A32-2	GCA_013200955.2	Complete Genome	4.4	1	63.5	98.29	0.73
Pseudomonas canadensis	GZH03	GCA_030980095.1	Complete Genome	6.4	2	60.5	100	0.19
Pseudomonas canavaninivorans	SWRI17	GCA_019141525.1	Complete Genome	6.3	1	61	99.86	0.08
Pseudomonas cannabina	MAFF 301419	GCA_016599635.1	Complete Genome	6.1	2	58.5	99.68	0.29
Pseudomonas capeferrum	WCS358	GCA_000731675.1	Scaffold	5.9	17	62.5	100	0.28
Pseudomonas capsici	Pc19-1	GCA_017165765.1	Contig	5.8	59	58.5	100	0.08
Pseudomonas carbonaria	CIP 111764	GCA_904061905.1	Scaffold	5.5	159	66	99.34	0.55
Pseudomonas caricapapayae	ICMP 2855	GCA_001400735.1	Scaffold	6.3	198	58.5	99.84	0.19
Pseudomonas carnis	20TX0167	GCA_024722005.1	Scaffold	6	46	60	99.98	0.11
Pseudomonas caspiana	WHRI 7043	GCA_040224095.2	Complete Genome	6.3	1	57	100	0.4
Pseudomonas cavernae	K2W31S-8	GCA_003595175.1	Complete Genome	4.9	1	64.5	97.6	1.21
Pseudomonas cavernicola	K1S02-6	GCA_003596405.1	Contig	5.6	8	60.5	96.74	2.39
Pseudomonas cedrina	LMG 23661	GCA_900104915.1	Chromosome	6.5	1	61	99.92	0.74
Pseudomonas cerasi	NTM-B-29	GCA_027983475.1	Contig	5.7	5	59.5	100	0.24
Pseudomonas ceruminis	CF-sbj2-Pt1-l	GCA_052697045.1	Complete Genome	6.4	3	61.5	99.81	1.2
Pseudomonas chaetocerotis	536	GCA_015712105.2	Contig	5.4	44	62.5	99.52	0.59
Pseudomonas chengduensis	MBR	GCA_017905455.1	Scaffold	5.4	78	62.5	99.5	0.34
Pseudomonas chlororaphis	NCTC10686	GCA_900455495.1	Complete Genome	7	3	62.5	97.34	2.83
Pseudomonas cichorii	DSM 50259	GCA_018343775.1	Complete Genome	6	1	58	99.68	0.4
Pseudomonas citri	OPS13-3	GCA_025336485.1	Contig	6.2	64	61	99.95	0.45
Pseudomonas citronellolis	P3B5	GCA_001586155.1	Complete Genome	7	1	67	99.68	2.45
Pseudomonas coleopterorum	LMG 28558	GCA_900105555.1	Contig	4.9	2	62	98.27	0.43
Pseudomonas composti	CCUG 59231	GCA_900115475.1	Scaffold	5.4	32	62.5	99.5	0.43
Pseudomonas congelans	DSM 14939	GCA_900103225.1	Scaffold	5.7	38	59.5	100	0.24
Pseudomonas coronafaciens	1_6	GCA_000156995.2	Complete Genome	5.7	2	58	100	0.24
Pseudomonas corrugata	EB-010	GCA_050920615.1	Complete Genome	6.5	2	60.5	99.79	0.51
Pseudomonas costantinii	LMG 22119	GCA_900105935.1	Contig	6.7	2	59.5	99.36	1.15
Pseudomonas cremoricolorata	DSM 17059	GCA_000425745.1	Scaffold	4.7	28	63.5	99.75	0.17
Pseudomonas cremoris	WS 5106	GCA_014230465.1	Contig	7.2	35	60	100	16.57
Pseudomonas crudilactis	UCMA 17988	GCA_013433315.1	Contig	6.6	82	59	99.68	0.08
Pseudomonas cuatrocienegasensis	CIP 109853	GCA_900110925.1	Scaffold	5.4	66	62	99.81	0.59
Pseudomonas cyclaminis	MAFF 301449	GCA_015163715.1	Contig	6.6	407	60.5	89.37	1.71
Pseudomonas daroniae	P18A	GCA_004327275.1	Contig	5.6	25	62	99.67	0.89
Pseudomonas deceptionensis	LMG 25555	GCA_900106095.1	Contig	5.1	2	58.5	99.84	0.56
Pseudomonas defluvii	WCHP16	GCA_001695625.1	Contig	5.7	369	59.5	95.48	3.53
Pseudomonas delhiensis	RLD-1	GCA_900187975.1	Contig	6.7	81	68	99.68	2.63
Pseudomonas donghuensis	P482	GCA_000696345.2	Complete Genome	5.7	1	62.5	99.36	0.91
Pseudomonas dryadis	P26B	GCA_004327355.1	Contig	5.7	88	65	99.61	0.47
Pseudomonas duriflava	CGMCC 1.6858	GCA_007830155.1	Contig	5	65	54	97.6	1.26
Pseudomonas edaphica	GCA_965277385.1	GCA_965277385.1	Complete Genome	6.6	1	60	99.84	0.74
Pseudomonas ekonensis	COR58	GCA_019145435.1	Contig	6.1	7	65	99.36	0.08
Pseudomonas endophytica	BSTT44	GCA_001411475.1	Contig	5	241	55	98.47	0.63
Pseudomonas entomophila	L48	GCA_000026105.1	Complete Genome	5.9	1	64	99.15	0.56
Pseudomonas eucalypticola	NP-1	GCA_013374995.1	Complete Genome	6.4	2	63	99.48	1.55
Pseudomonas extremaustralis	DSM 17835	GCA_900102035.1	Chromosome	6.7		60.5	99.76	1.54
Pseudomonas extremorientalis	1502IPR-01	GCA_024584605.1	Complete Genome	6.4	1	61	99.79	0.4
Pseudomonas fakonensis	COW40	GCA_019139895.1	Complete Genome	6.1	1	64.5	99.36	0.48
Pseudomonas farris	R-90874	GCA_976987215.1	Contig	6.3	2	59	99.68	0.24
Pseudomonas farsensis	SWRI107	GCA_014268805.2	Contig	5.2	6	62.5	99.68	1.04
Pseudomonas faucium	BML-PP048	GCA_021602585.1	Contig	5.9	89	64	99.68	0.65
Pseudomonas ficuserectae	ZJDX-003	GCA_024584585.1	Complete Genome	6.5	4	58	98.81	0.08
Pseudomonas fildesensis	KG01	GCA_001050345.1	Contig	6.3	47	60	99.68	0.53
Pseudomonas fitomaticsae	FIT81	GCA_021018765.1	Complete Genome	6.5	1	60.5	99.68	0.18
Pseudomonas flavescens	NBRC 103044	GCA_002091575.1	Contig	5.8	63	63.5	99.91	0.49
Pseudomonas flexibilis	JCM 14085	GCA_000806415.1	Contig	3.7	16	66	98.02	1.16
Pseudomonas floridensis	GEV388	GCA_002087235.1	Scaffold	6.1	288	59	99.49	1.82
Pseudomonas fluorescens	ATCC 13525	GCA_900215245.1	Chromosome	6.5	1	60	99.63	0.62
Pseudomonas fluvialis	ZYSR67-Z	GCA_002835605.1	Scaffold	3.4	40	62.5	94.87	0.27
Pseudomonas folii	DOAB 1069	GCA_014357575.1	Contig	6	289	57	98.08	0.72
Pseudomonas fragi	NL20W	GCA_015476275.1	Complete Genome	5.1	2	59.5	99.68	0.22
Pseudomonas frederiksbergensis	ERDD5:01	GCA_001874645.1	Complete Genome	6.1	2	58.5	98.65	0.29
Pseudomonas fulva	NY5087	GCA_039634495.1	Complete Genome	5.4	3	61	96.89	6.05
Pseudomonas furukawaii	KF707	GCF_002355475.1	Complete Genome	6.2	2	65.5	99.34	0.72
Pseudomonas fuscovaginae	ATCC 23835	GCA_900105475.1	Chromosome	6.5	1	61	99.96	0.78
Pseudomonas germanica	FIT28	GCA_019614655.1	Complete Genome	6.7	1	59	99.68	0.26
Pseudomonas gessardii	LMG 21604	GCA_900101185.1	Contig	6.7	3	60.5	99.28	0.67
Pseudomonas gingeri	A6001	GCA_013386115.1	Scaffold	7.4	46	63	100	1.84
Pseudomonas glycinae	MS586	GCA_001594225.2	Complete Genome	6.4	1	60.5	98.72	4.6
Pseudomonas gozinkensis	IzPS32d	GCA_014863585.1	Complete Genome	6.6	1	60.5	99.25	0.1
Pseudomonas graminis	DSM 11363	GCA_900111735.1	Scaffold	5.9	117	60.5	99.25	0.1
Pseudomonas granadensis	LMG 27940	GCA_900105485.1	Chromosome	5.9	1	60	99.68	0.08
Pseudomonas gregormendelii	LMG 28632	GCA_017114825.1	Scaffold	5.8	112	59.5	99.63	0.1
Pseudomonas grimontii	DSM 17515	GCA_900101085.1	Contig	7.1	2	60	99.2	1.17
Pseudomonas guangdongensis	CCTCC AB 2012022	GCA_900105885.1	Chromosome	3.2	1	68.5	94.53	0.69
Pseudomonas guariconensis	NY14324	GCA_040822035.1	Complete Genome	5.3	1	62.5	99.31	0.22
Pseudomonas guguanensis	JCM 18416	GCA_900104265.1	Scaffold	5.1	36	64	99.83	0.14
Pseudomonas guineae	LMG 24016	GCA_900113745.1	Scaffold	4.1	11	58.5	99.52	0.9
Pseudomonas guryensis	SR9	GCA_014164785.1	Scaffold	4.3	8	63.5	97.63	0.15
Pseudomonas haemolytica	DSM 108987	GCA_009659625.1	Contig	6	21	60	100	0.51
Pseudomonas hamedanensis	SWRI65	GCA_014268595.2	Complete Genome	6	1	60	99.68	0.08
Pseudomonas helleri	NF1a	GCA_045830615.1	Complete Genome	5.6	1	58	99.79	0.53
Pseudomonas helmanticensis	LMG 28168	GCA_900182985.1	Contig	6.5	2	59	99.64	0.44
Pseudomonas huaxiensis	WCHPs060044	GCA_003231275.1	Contig	7.3	241	62.5	99.52	0.83
Pseudomonas humi	P3B5	GCA_001586155.1	Complete Genome	7	1	67	99.68	2.45
Pseudomonas hunanensis	xwS6	GCA_051027635.1	Complete Genome	6	1	62	100	0.11
Pseudomonas hydrolytica	DSWY01	GCA_021495345.2	Complete Genome	5.3	1	64.5	99.83	0.8
Pseudomonas hygromyciniae	SDM007_2	GCA_016924785.1	Contig	6.2	256	60	99.6	0.31
Pseudomonas indica	NBRC 103045	GCA_002091635.1	Contig	5.8	62	64	98.59	0.59
Pseudomonas indoloxydans	GD03646	GCA_029845265.1	Contig	4.6	119	62	99.71	1.05
Pseudomonas inefficax	7.8.24	GCA_032164165.1	Chromosome	5.9	1	63	100	0.11
Pseudomonas insulae	UL073	GCA_016901015.1	Contig	4.9	10	66	99.34	0.28
Pseudomonas iranensis	SWRI54	GCA_014268585.2	Complete Genome	6.1	1	60	99.63	0.19
Pseudomonas iridis	Y-22	GCA_025397885.1	Contig	6.3	31	58.5	99.68	1.28
Pseudomonas izuensis	LAB-08	GCA_002356535.2	Complete Genome	6.7	1	59.5	99.68	0.92
Pseudomonas japonica	NBRC 103040	GCA_000730585.1	Contig	6.7	162	64	99.04	1.41
Pseudomonas jessenii	LMG 21605	GCA_900104905.1	Contig	6.6	2	59.5	99.65	0.32
Pseudomonas jilinensis	JS15-10A1	GCA_003586265.1	Contig	4	57	60	91.62	2.03
Pseudomonas juntendi	PP_2463	GCA_021560075.1	Complete Genome	5.6	3	62.5	99.68	0.59
Pseudomonas kairouanensis	KC12	GCA_004682055.1	Contig	6.7	107	60.5	99.68	2.17
Pseudomonas karstica	CCM 7891	GCA_009707515.1	Contig	5.8	114	59	99.68	0.43
Pseudomonas kermanshahensis	Mr36	GCA_029215585.1	Complete Genome	6.2	1	62.5	100	0.22
Pseudomonas khavaziana	SR9	GCA_036704165.1	Complete Genome	6.3	1	60	100	0.8
Pseudomonas khazarica	ODT-83	GCA_017915135.1	Complete Genome	5.4	1	65	99.83	0.22
Pseudomonas khorasanensis	SWRI153	GCA_014268505.2	Contig	5.6	71	59.5	99.63	0.19
Pseudomonas kielensis	ZE23JCel16	GCA_030505375.1	Complete Genome	5.9	1	61	98.04	0.61
Pseudomonas kilonensis	R-92683	GCA_976997665.1	Complete Genome	6.4	1	61	99.95	0.46
Pseudomonas kitaguniensis	M8	GCA_049199985.1	Scaffold	6	104	59.5	99.31	0.29
Pseudomonas knackmussii	N1-2	GCA_009911755.1	Complete Genome	6.1	1	65.5	99.36	2.26
Pseudomonas koreensis	CRS05-R5	GCA_001654515.1	Complete Genome	6	1	60.5	99.57	0.08
Pseudomonas kribbensis	46-2	GCA_003352185.1	Complete Genome	6.3	1	60.5	99.68	0.13
Pseudomonas kurunegalensis	ANKC.G2	GCA_030291635.1	Complete Genome	6.1	1	62	100	0.44
Pseudomonas kuykendallii	NRRL B-59562	GCA_900106975.1	Scaffold	4.7	18	66	99.36	1.07
Pseudomonas lactis	DSM 29167	GCA_001439845.1	Contig	6.7	42	60	99.57	0.61
Pseudomonas lactucae	W20_MBD1_FM9	GCA_036688725.1	Contig	6.5	52	60.5	100	0.87
Pseudomonas lalkuanensis	PE08	GCA_008807375.1	Complete Genome	6.1	1	64	100	0.44
Pseudomonas lalucatii	R1b54	GCA_018398425.1	Contig	4.6	2	67	98.13	1.37
Pseudomonas laurentiana		GCA_963678005.1	Complete Genome	5.1	1	59.5	98.61	0.99
Pseudomonas laurylsulfatiphila	AP3_16	GCA_002934665.1	Contig	6.7	13	60	99.68	0.13
Pseudomonas laurylsulfativorans	AP3_22	GCA_002906155.1	Contig	6.7	30	59.5	99.68	0.32
Pseudomonas leptonychotis	CCM 8849	GCA_047758745.1	Complete Genome	4.8	1	58.5	99.15	0.47
Pseudomonas libanensis	DSM 17149	GCA_001439685.1	Contig	6.2	43	60	99.97	0.08
Pseudomonas lijiangensis	LJ2	GCA_018968705.1	Complete Genome	5.9	1	58.5	99.57	0.88
Pseudomonas lini	DSM 16768	GCA_900104735.1	Chromosome	6.5	1	6.5	99.36	0.3
Pseudomonas linyingensis	LMG 25967	GCA_900109175.1	Scaffold	4.7	46	66.5	95.13	2.5
Pseudomonas lopnurensis	AL-54	GCA_015070855.1	Scaffold	4.9	161	64.5	99.4	1.2
Pseudomonas lundensis	2T.2.5.2	GCA_015377145.2	Complete Genome	4.9	2	58.5	99.6	0.44
Pseudomonas lurida	BF8PS1	GCA_044499395.1	Complete Genome	6	1	61	100	0.51
Pseudomonas lutea	DSM 17257	GCA_000759445.1	Contig	5.6	5	60	99.17	0.16
Pseudomonas luteola	NBRC 103146	GCA_002091675.1	Contig	5.4	104	55.5	98.88	1
Pseudomonas mandelii	LMG 21607	GCA_900106065.1	Chromosome	7	1	59	99.52	0.47
Pseudomonas mangiferae	DMKU BBB3-04	GCA_007109405.1	Contig	4.7	41	67.5	98.07	0.48
Pseudomonas mangrovi	TC11	GCA_003052585.1	Scaffold	4.1	25	64.5	97.12	0.52
Pseudomonas marginalis	PS92	GCA_034011435.1	Complete Genome	6.8	1	60.5	100	1.36
Pseudomonas marianensis	PS1	GCA_022810315.1	Scaffold	4.7	107	63	99.34	0.54
Pseudomonas marincola	YSy11	GCA_900682675.2	Complete Genome	4.8	1	57.5	99.68	0.69
Pseudomonas marvdashtae	SWRI102	GCA_014268655.2	Contig	5.9	18	60.5	99.13	0.17
Pseudomonas massiliensis	CB1	GCA_000826105.1	Contig	4.7	7	62.5	97.94	0.75
Pseudomonas matsuisoli	JCM 30078	GCA_014647635.1	Scaffold	4.6	21	59.5	97.09	0.72
Pseudomonas maumuensis	COW77	GCA_019139675.1	Complete Genome	5.8	1	64	99.68	0.24
Pseudomonas mediterranea	DSM 16733	GCA_900106005.1	Chromosome	6.3	1	61	99.63	0.14
Pseudomonas meliae	ICMP 6289	GCA_001400515.1	Scaffold	5.1	636	58.5	95.17	0.14
Pseudomonas mendocina	S5.2	GCA_000733715.2	Complete Genome	5.4	2	62.5	97.98	2.25
Pseudomonas mercuritolerans	SAICEUPSM	GCA_025706525.1	Contig	6.2	54	60	99.63	0.19
Pseudomonas migulae	LMG 21608	GCA_900106025.1	Contig	6.8	2	59	99.36	0.77
Pseudomonas mohnii	DSM 18327	GCA_900105115.1	Contig	6.6	2	59.5	99.57	0.25
Pseudomonas monsensis	PGSB 8459	GCA_014268495.2	Complete Genome	6.4	2	60	99.36	0.09
Pseudomonas monteilii	B5	GCA_003671975.1	Complete Genome	6.1	2	61.5	95.46	4.96
Pseudomonas moorei	m318	GCA_042846945.2	Complete Genome	6.5	1	59.5	99.36	0.37
Pseudomonas moraviensis	#71	GCA_036283065.1	Contig	6.2	44	60	99.63	0.08
Pseudomonas morbosilactucae	MAFF 302046	GCA_023241665.1	Contig	7	117	62.5	95.86	1.2
Pseudomonas mosselii	PtA1	GCA_002736065.1	Complete Genome	5.7	1	64.5	99.68	0.51
Pseudomonas mucidolens	NCTC8068	GCA_900475945.1	Complete Genome	5.9	1	59	99.04	0.5
Pseudomonas mucoides	P154a	GCA_015461845.1	Scaffold	7	22	59	99.68	2.13
Pseudomonas multiresinivorans	populi	GCA_012971725.1	Complete Genome	6.5	1	65	99.88	1.37
Pseudomonas muyukensis	COW39	GCA_019139535.1	Complete Genome	5.5	1	65	99.68	0.11
Pseudomonas nabeulensis	E10B	GCA_004682045.1	Contig	6.8	150	60.5	100	1.47
Pseudomonas neuropathica	P155	GCA_015461835.1	Scaffold	6.5	54	59	99.68	0.19
Pseudomonas neustonica	SSM26	GCA_003797945.1	Contig	4.3	77	56	92.1	3.17
Pseudomonas nicosulfuronedens	LAM1902	GCA_005877905.1	Contig	6.7	141	65	99.47	1.62
Pseudomonas nitritireducens	WZBFD3-5A2	GCA_010994165.1	Contig	6.4	12	65	99.56	1.66
Pseudomonas nitroreducens	WZBFD3-5A2	GCA_010994165.1	Contig	6.4	12	65	99.56	1.66
Pseudomonas nunensis	In5	GCA_024296925.1	Complete Genome	7.3	1	59.5	99.17	0.56
Pseudomonas ogarae	SWRI108	GCA_014268695.2	Complete Genome	6.6	1	61	99.95	0.16
Pseudomonas oleovorans	GD03646	GCA_029845265.1	Contig	4.6	119	62	99.71	1.05
Pseudomonas oligotrophica	JM10B5a	GCA_021726475.1	Contig	4	20	67	99.36	0.08
Pseudomonas putida PRS1	PRS1	GCA_024508115.1	Complete Genome	6.2	1	62.5	99.77	1.33
Pseudomonas orientalis	8B	GCA_003852045.1	Complete Genome	5.9	1	60.5	100	0.57
Pseudomonas oryzae	KCTC 32247	GCA_900104805.1	Chromosome	4.6	1	67.5	95.09	1.7
Pseudomonas oryzagri	MAHUQ-58	GCA_020831405.1	Scaffold	4.5	50	67.5	93.3	1.55
Pseudomonas oryzicola	RD9SR1	GCA_014269185.2	Contig	5.3	24	63	100	0.25
Pseudomonas oryzihabitans	FDAARGOS_657	GCA_008693825.1	Complete Genome	5.3	3	66	98.56	0.61
Pseudomonas oryziphila	1257	GCA_003940825.1	Complete Genome	6	1	64	99.68	0.22
Pseudomonas otitidis	MrB4	GCA_011397855.1	Complete Genome	6.1	1	67	100	0.77
Pseudomonas ovata	F51	GCA_003131185.1	Contig	6.4	72	62	99.68	0.83
Pseudomonas palleroniana	Q1	GCA_022836895.1	Complete Genome	6.2	1	60.5	99.92	0.59
Pseudomonas palmensis	21GA0604	GCA_049942755.1	Complete Genome	5.8	1	64	99.51	0.97
Pseudomonas panipatensis	CCM 7469	GCA_900099785.1	Scaffold	5.8	36	65.5	99.25	1.26
Pseudomonas paracarnis	GTVSS-025	GCA_046272155.1	Complete Genome	6.3	1	60	99.05	0.8
Pseudomonas paraeruginosa	Cr1	GCA_003025345.2	Complete Genome	6.2	2	67	99.01	0.14
Pseudomonas parafulva	NBRC 16636	GCA_000730645.1	Contig	5	55	62.5	100	0.11
Pseudomonas paraglycinae	BML-PP023	GCA_021601625.1	Contig	6.3	55	60.5	99.63	0.08
Pseudomonas parakoreensis	BML-PP030	GCA_021602155.1	Contig	6.2	113	60	99.36	0.08
Pseudomonas paralactis	DSM 29164	GCA_001439735.1	Contig	6	37	59.5	100	0.43
Pseudomonas paralcaligenes	MRCP1333	GCA_019655855.2	Contig	5.4	50	66.5	98.08	0.78
Pseudomonas parasichuanensis	BML-PP020	GCA_021601385.1	Contig	5.9	134	64	99.04	0.11
Pseudomonas paraversuta	UBT376	GCA_904067025.1	Contig	5	2	58.5	99.57	0.84
Pseudomonas peli	DSM 17833	GCA_900099645.1	Scaffold	4.5	21	59.5	99.44	0.18
Pseudomonas peradeniyensis	BW13M1	GCA_014268935.2	Contig	5.9	9	64.5	98.08	0.24
Pseudomonas pergaminensis	1008	GCA_024112395.2	Complete Genome	6.6	1	60.5	100	1.58
Pseudomonas petrae	P2653	GCA_021728295.1	Contig	5.9	36	60.5	99.41	0.22
Pseudomonas petroselini	M14	GCA_045037875.1	Complete Genome	6.9	2	60	100	1.04
Pseudomonas pharmacofabricae	ZYSR67-Z	GCA_002835605.1	Scaffold	3.4	40	62.5	94.87	0.27
Pseudomonas pharyngis	BML-PP036	GCA_021602345.1	Contig	6.5	56	60.5	99.31	0.28
Pseudomonas phenolilytica	RBPA9	GCA_021432765.1	Complete Genome	3.9	1	64.5	98.64	0.11
Pseudomonas phytophila	ICMP 23753	GCA_025643095.1	Complete Genome	6.6	1	57	100	0.45
Pseudomonas pisciculturae	P115	GCA_015461805.1	Complete Genome	3.9	1	64.5	100	2
Pseudomonas piscis	MC042	GCA_009380155.1	Contig	6.9	20	63.5	99.63	4.54
Pseudomonas plecoglossicida	ATCC 700383	GCA_052907105.1	Complete Genome	5.4	1	63	100	0.11
Pseudomonas poae	RE*1-1-14	GCA_000336465.1	Complete Genome	5.5	1	61	99.68	0.75
Pseudomonas pohangensis	DSM 17875	GCA_900105995.1	Chromosome	3.8	1	59.5	92.98	0.61
Pseudomonas profundi	M5	GCA_008638305.1	Scaffold	4.2	57	58.5	92.37	2.51
Pseudomonas promysalinigenes	RW10S1	GCA_014269025.2	Complete Genome	5	1	60.5	100	0.23
Pseudomonas prosekii	LMG 26867	GCA_900105155.1	Chromosome	6.1	1	59.5	99.68	0.4
Pseudomonas protegens	CHA0	GCA_900560965.1	Complete Genome	6.9	1	63.5	99.28	0.72
Pseudomonas proteolytica	LMG 22710	GCA_900105955.1	Complete Genome	6.5	7	60.5	99.92	0.54
Pseudomonas pseudonitroreducens	BML-PP015	GCA_021603645.1	Contig	7	92	64.5	99.8	1.87
Pseudomonas psychrophila	KM02	GCA_011040435.1	Complete Genome	5.3	1	57.5	99.48	0.19
Pseudomonas psychrotolerans	FDAARGOS_657	GCA_008693825.1	Complete Genome	5.3	1	66	98.56	0.61
Pseudomonas pudica	20-MO00628-0	GCA_015680405.1	Contig	5.9	131	63	100	0.11
Pseudomonas punonensis	CECT 8089	GCA_900142655.1	Scaffold	4.8	24	62	100	0.6
Pseudomonas putida	NBRC 14164	GCA_000412675.1	Complete Genome	6.2	1	62.5	99.71	1.33
Pseudomonas qingdaonensis	S-1	GCA_018398475.1	Complete Genome	5.9	1	64	99.29	0.91
Pseudomonas quasicaspiana	CDFA553	GCA_021147825.1	Contig	6.5	138	57	100	1.04
Pseudomonas quebecensis	S1Bt42	GCA_026410085.1	Chromosome	5.6	1	61	100	0.08
Pseudomonas quercus	hsmgli-8	GCA_012033695.1	Scaffold	5	51	59.5	98.05	0.8
Pseudomonas reactans	IPO3751	GCA_013387025.1	Scaffold	6.8	254	60	99.74	0.77
Pseudomonas reidholzensis	CCOS 865	GCA_900536025.1	Contig	6.2	45	64	99.68	0.11
Pseudomonas reinekei	MT1	GCA_001945365.1	Chromosome	6.2	63	59	99.36	0.75
Pseudomonas resinovorans	DSM 21078	GCA_000423545.1	Scaffold	6	60	63.5	99.61	0.36
Pseudomonas rhizophila	AS1	GCA_051828235.1	Complete Genome	6.5	2	60	99.95	1.82
Pseudomonas rhizoryzae	RY24	GCA_005250615.1	Contig	5.3	45	65	98.56	1.15
Pseudomonas rhizosphaerae	DSM 16299	GCA_000761155.1	Complete Genome	4.7	1	62	98.75	0.28
Pseudomonas rhodesiae	NL2019	GCA_013285305.1	Complete Genome	5.8	1	60.5	100	0.19
Pseudomonas rustica	CBSDS_010	GCA_049959085.1	Complete Genome	6.3	1	59	99.68	0.4
Pseudomonas sagittaria	JCM 18195	GCA_900115715.1	Scaffold	4.6	47	66.5	96.65	1.86
Pseudomonas saliphila	16W4-4-3	GCA_008638345.1	Contig	4.4	59	58.5	92.69	3.24
Pseudomonas salmasensis	SWRI126	GCA_014268375.2	Complete Genome	6.3	1	60	99.89	0.11
Pseudomonas salomonii	LMG 22120	GCA_001730645.1	Contig	7.1	81	60	99.33	0.85
Pseudomonas saponiphila	DSM 9751	GCA_900105185.1	Contig	7.4	4	63	98.55	2.03
Pseudomonas saudimassiliensis	12M76_air	GCA_000939975.1	Scaffold	3.3	7	62.5	90.43	2.07
Pseudomonas saudiphocaensis	20_BN	GCA_000756775.2	Complete Genome	3.7	1	61	98.52	0.35
Pseudomonas savastanoi	MHT1	GCA_020917325.1	Complete Genome	6	1	58.5	99.94	0.08
Pseudomonas saxonica	DSM 108989	GCA_007858365.1	Contig	5.3	40	56.5	99.73	0.2
Pseudomonas schmalbachii	Milli4	GCA_017589465.1	Contig	5.5	49	65	98.99	0.94
Pseudomonas sediminis	B10D7D	GCA_013409125.2	Complete Genome	4.9	1	62.5	99.84	0.79
Pseudomonas segetis	CIP 108523	GCA_900188155.1	Scaffold	4.7	19	56.5	99.63	0.29
Pseudomonas seleniipraecipitans	LMG 25475	GCA_900102335.1	Scaffold	4.5	22	61.5	99.89	0.48
Pseudomonas serbica	IT-P366	GCA_028823535.1	Contig	7.6	90	59.5	99.68	7.32
Pseudomonas serboccidentalis	IT-P374	GCA_028830055.1	Chromosome	6	39	60.5	99.68	0.4
Pseudomonas putida	KT2440	GCA_900167985.1	Chromosome	6.2	1	61.5	99.37	0.6
Pseudomonas sessilinigenes	CMR12a	GCA_003850565.1	Complete Genome	6.9	1	63	99.57	1.6
Pseudomonas shahriarae	SWRI52	GCA_014268455.2	Complete Genome	6.1	1	60.5	99.92	0.42
Pseudomonas shirazensis	R-92707	GCA_976997645.1	Complete Genome	5.2	1	62	100	0.32
Pseudomonas shirazica	A28	GCA_015168335.1	Complete Genome	6	2	62.5	100	1.12
Pseudomonas sichuanensis	B21-027	GCA_024749065.1	Complete Genome	6	1	63.5	99.25	0.11
Pseudomonas sihuiensis	KCTC 32246	GCA_900106015.1	Chromosome	5.5	1	62.5	99.79	0.18
Candidatus Pseudomonas excrementavium	CHK174-787	GCA_019116555.1	Contig	3	348	62
Pseudomonas silensiensis	A3_3	GCA_050434865.1	Contig	7.3	56	58.5	99.68	1.61
Pseudomonas silesiensis	A3	GCA_001661075.1	Complete Genome	6.8	1	59.5	99.54	0.81
Pseudomonas siliginis	OTU6BANIB1	GCA_024072275.1	Complete Genome	6.1	2	60	99.31	0.19
Pseudomonas simiae	PCL1751	GCA_000934565.1	Complete Genome	6.1	1	60.5	99.36	0.4
Pseudomonas sivasensis	BsEB-1	GCA_021391435.1	Complete Genome	6.1	1	60	100	0.59
Pseudomonas solani	T3	GCA_040281505.1	Complete Genome	6.7	1	66.5	99.36	0.76
Pseudomonas soli	NMI4264_15	GCA_021283165.2	Complete Genome	6	1	64	99.68	0.22
Pseudomonas songnenensis	NEAU-ST5-5	GCA_003696315.1	Contig	4.3	25	63	100	0.08
Pseudomonas sp.	SGAir0191	GCA_002812565.2	Complete Genome	5.1	1	61.5	99.49	0.86
Pseudomonas spelaei	CCM 7893	GCA_009724245.1	Contig	6.6	97	59.5	99.68	0.75
Pseudomonas sputi	BML-PP014	GCA_021603585.1	Contig	6.3	105	60.5	99.31	0.1
Pseudomonas straminea	JCM 2783	GCA_900112645.1	Scaffold	5	23	63	99.63	0.11
Pseudomonas subflava	YIM B01952	GCA_023823685.1	Contig	4.4	31	66.5	97.86	0.08
Pseudomonas synxantha	NCTC10696	GCA_901482615.1	Complete Genome	6.8	1	59.5	99.6	0.76
Pseudomonas syringae	Susan2139	GCA_018394375.1	Complete Genome	5.9	2	59	99.73	1.7
Pseudomonas syringae group genomosp3	DC3000	GCA_000007805.1	Complete Genome	6.5	3	58.5	99.36	0.19
Pseudomonas syringae group genomosp 7	ICMP 4091	GCA_022557255.1	Complete Genome	6.1	3	58	100	0.2
Pseudomonas syringae pv	NCPPB 4273	GCA_000972175.1	Contig	6.1	93	59	100	0.27
Pseudomonas taeanensis	MS-3	GCA_000498575.2	Contig	5.5	18	61	99.04	1.74
Pseudomonas taetrolens	NCTC10697	GCA_900475285.1	Complete Genome	4.8	1	58.5	98.82	0.28
Pseudomonas taiwanensis	DSM 21245	GCA_000425785.1	Scaffold	5.4	74	62	100	0.22
Pseudomonas tehranensis	SWRI196	GCA_014268615.1	Contig	6	531	60.5	99.61	0.11
Pseudomonas tensinigenes	ZA 5.3	GCA_014268445.2	Complete Genome	6.6	1	59	99.68	0.19
Pseudomonas thermotolerans	J53	GCA_000513835.1	Scaffold	3.8	64	67	99.39	0.86
Pseudomonas thivervalensis	DSM 13194	GCA_001269655.1	Contig	6.6	25	61	99.95	0.19
Pseudomonas tohonis	TUM18999	GCA_012767755.2	Complete Genome	6.8	1	66.5	99.04	1.36
Pseudomonas tolaasii	NCPPB 2192	GCA_002813445.1	Contig	6.8	1	60.5	100	1.1
Pseudomonas toyotomiensis	SM2	GCA_017167985.1	Complete Genome	5.2	1	63	99.83	0.47
Pseudomonas tremae	PA-1-10F	GCA_023278125.1	Complete Genome	5.9	3	57.5	99.52	0.57
Pseudomonas tritici	SWRI145	GCA_014268275.3	Complete Genome	6.2	1	60	100	0.51
Pseudomonas triticicola	SWRI88	GCA_019145375.1	Contig	5.8	5	60	95.15	0.12
Pseudomonas triticifolii	DOAB 1067	GCA_014358015.1	Contig	5.5	49	59.5	99.52	0.08
Pseudomonas trivialis	P_trivialis_W04_8	GCA_036864995.1	Complete Genome	5.5	1	61	98.06	0.4
Pseudomonas tructae	SNU WT1	GCA_004214895.1	Complete Genome	5.7	1	62	99.79	1.87
Pseudomonas tumuqii	LAMW06	GCA_013184545.1	Contig	5.5	65	63.5	99.15	2.05
Pseudomonas turukhanskensis	VKM B-2935	GCA_027922365.1	Scaffold	5.9	66	60.5	99.32	0.67
Pseudomonas Hu109A	Hu109A	SRR16999042
Pseudomonas typographi	CA3A	GCA_014694385.1	Contig	6	209	62	97.76	1.2
Pseudomonas ullengensis	UL070	GCA_014174475.1	Scaffold	4.6	14	63.5	98.62	0.15
Pseudomonas umsongensis	CY-1	GCA_012647205.1	Complete Genome	6.7	1	59.5	80.83	12.27
Pseudomonas urethralis	BML-PP042	GCA_021602465.1	Contig	5.9	76	62.5	100	0.26
Pseudomonas urmiensis	SWRI10	GCA_014268815.2	Contig	5.8	9	62	99.48	0.43
Pseudomonas uvaldensis	20TX0172	GCA_021271205.1	Contig	6	65	61	99.83	0.11
Pseudomonas vancouverensis	LMG 20222	GCA_900105825.1	Chromosome	6.4	1	60	99.64	0.59
Pseudomonas vanderleydeniana	RW8P3	GCA_014268755.2	Complete Genome	7	1	63	99.96	0.86
Pseudomonas sp. CCOS 191	CCOS 191	GCA_001007005.1	Complete Genome	6	1	64	99.52	0.28
Pseudomonas veronii	R02	GCA_002028325.1	Complete Genome	6.9	1	61	100	1.6
Pseudomonas versuta	L10.10	GCA_001294575.1	Complete Genome	5.1	1	58	99.33	0.83
Pseudomonas viciae	11K1	GCA_004786035.1	Complete Genome	6.7	2	60.5	99.95	1.05
Pseudomonas viridiflava	CFBP 1590	GCA_900184295.1	Complete Genome	6.1	1	59	99.08	1.43
Pseudomonas vlassakiae	RW4S2	GCA_014269035.2	Contig	5.6	80	63	100	0.45
Pseudomonas vranovensis	VKM B-2935	GCA_040438935.1	Complete Genome	5.8	1	61.5	98.74	1.04
Pseudomonas wadenswilerensis	B21-022	GCA_024749185.1	Complete Genome	5.8	1	62.5	99.84	0.59
Pseudomonas wayambapalatensis	DGI-4	GCA_049942315.1	Contig	5.6	237	63.5	99.68	0.64
Pseudomonas weihenstephanensis	TMW2.1728	GCA_016812185.1	Contig	4.8	21	57.5	99.79	0.37
Pseudomonas wenzhouensis	A20	GCA_021029445.1	Complete Genome	4.5	1	62	98.51	1.07
Pseudomonas xantholysinigenes	RW9S1A	GCA_014268885.2	Complete Genome	5.6	1	64	99.52	0.11
Pseudomonas xanthosomatis	COR54	GCA_019139835.1	Complete Genome	6	1	64	99.68	0.32
Pseudomonas xionganensis	R-22-3 w-18	GCA_009763245.1	Scaffold	4	20	63	97.6	0.12
Pseudomonas yamanorum	LMG 27247	GCA_900105735.1	Chromosome	7.1	1	60.5	99.98	0.35
Pseudomonas yangonensis	MY50	GCA_009932725.1	Contig	5.1	301	63	99.76	0.19
Pseudomonas zanjanensis	SWRI12	GCA_014268745.2	Contig	6.3	18	61	94.83	0.72
Pseudomonas zarinae	SWRI108	GCA_014268695.2	Complete Genome	6.6	1	61	99.95	0.16
Pseudomonas zeae	OE 48.2	GCA_014268485.2	Complete Genome	6.6	1	59	99.68	0.08
Pseudomonas zeshuii	NBRC 103146	GCA_002091675.1	Contig	5.4	104	55.5	98.88	1
