# Supplementary material
Source: Royal Society of Chemistry journal article supplement (doi:10.1039/d6gc01067a)
Supplement: d6gc01067a2.xlsx [file d6gc01067a2.xlsx]

## Sheet: Sheet1
	Supplementary Table 2: Detailed definition of metabolic modules, including essential genes, their full annotations, and accepted alternative enzyme variants based on KEGG and NCBI databases.
	Pathways	Genes names (Short form)	Full form	Other name (on KEGG database)	Other name (on NCBI)
	Biphenyl	BphA,BphA1,BphA2,BphA3,BphA4	Biphenyl dioxygenase	biphenyl 2,3-dioxygenase subunit alpha	aromatic-ring-hydroxylating dioxygenase
					alpha subunit, Benzoate 4-monooxygenase
		BphB	Dihydrodiol dehydrogenase	cis-2,3-dihydrobiphenyl-2,3-diol dehydrogenase	-
		BphC,BphX1,BphX2,BphX3	2,3-dihydroxybiphenyl dioxygenase	biphenyl-2,3-diol 1,2-dioxygenase	manganese-dependent 2,3-dihydroxybiphenyl 1,2-dioxygenase
		BphD	4-hydroxy-2-oxovolerate aldolase	2,6-dioxo-6-phenylhexa-3-enoate hydrolase	2-hydroxy-6-oxo-6-phenylhexa-2,4-dienoate hydrolase
		BphE	2-hydroxypenta-2,4-dienoate hydratase	-	2-keto-4-pentenoate hydratase,
					2-oxopent-4-enoate hydratase,
					2-oxo-hepta-3-ene-1,7-dioic acid hydratase
		BphF	4-hydreoxy-2-oxovolerate aldolase	-	Biphenyl dioxygenase system ferredoxin subunit
		BphG	Acetaldehyde dehydrogenase	-	Biphenyl dioxygenase system ferredoxin--NAD(+) reductase component,
	ß-aryl ether	LigD,LigN,LigL	Cὰ-dehydrogenase	-	DNA ligase D
		LigE	b-etherases	-	beta-aryl ether cleaving enzyme
		LigF	glutathione reductases	-	beta-etherase
		LigP	-	-	-
		LigG	Feruloyl-CoA hydratase	-	glutathione S-transferase
		HpvZ	-	-
		ALDH	-	-	aldehyde dehydrogenases
	Ferulic acid	Fcs	feruloyl-CoA synthetase	-	feruloyl-CoA synthetase
		vdh	vanillin dehydrogenase	-	Valine dehydrogenase,
					Salicylaldehyde dehydrogenase,
					vitamin D(3) 25-hydroxylase,
					leucine dehydrogenase
		ech	enoyl-CoA hydratase/aldolase	-	p-hydroxycinnamoyl CoA hydratase/lyase
			HMPHP-CoA dehydrogenase	-
		aat, phbA (NCBI)	β-ketothiolase,	-
			vanillyl-CoA hydrolase	-
	Coumaric acid	Fcs	feruloyl-CoA synthetase,	-	feruloyl-CoA synthetase
		vdh	vanillin dehydrogenase and vanillin dehydrogenase	-	Valine dehydrogenase,
					Salicylaldehyde dehydrogenase,
					vitamin D(3) 25-hydroxylase,
					leucine dehydrogenase
		ech	enoyl-CoA hydratase/ aldolase		p-hydroxycinnamoyl CoA hydratase/lyase
	Catechol	catA	catechol 1, 2-dioxygenase	catechol 1,2-dioxygenase	Catalase
					type A chloramphenicol O-acetyltransferase
		catB	muconate cycloisomerase	muconate cycloisomerase	chloramphenicol acetyltransferase
					type B chloramphenicol O-acetyltransferase
		catC	muconate cycloisomerase	muconolactone D-isomerase	muconolactone delta-isomerase
					type C chloramphenicol O-acetyltransferase
		xylF	2-Hydroxymuconic semialdehyde hydrolase	2-Hydroxymuconic semialdehyde hydrolase	2-Hydroxymuconic semialdehyde hydrolase
		dmpD	2-Hydroxymuconic semialdehyde hydrolase	2-Hydroxymuconic semialdehyde hydrolase	2-Hydroxymuconic semialdehyde hydrolase
		xylJ	2-Oxopent-4-enoate hydratase	2-Oxopent-4-enoate hydratase	2-Oxopent-4-enoate hydratase
		dmpE	2-Oxopent-4-enoate hydratase	2-Oxopent-4-enoate hydratase	2-Oxopent-4-enoate hydratase
		xylK	4-Hydroxy-2-oxalovalerate aldolase	4-Hydroxy-2-oxalovalerate aldolase, 4-hydroxy-2-oxohexanoate aldolase	4-Hydroxy-2-oxalovalerate aldolase
		dmpG	4-Hydroxy-2-oxalovalerate aldolase	4-Hydroxy-2-oxalovalerate aldolase, 4-hydroxy-2-oxohexanoate aldolase	4-Hydroxy-2-oxalovalerate aldolase
		xylQ	Aldehyde dehydrogenase	Acetaldehyde dehydrogenase, Aldehyde dehydrogenase	Acetaldehyde dehydrogenase, Aldehyde dehydrogenase
		dmpF	Aldehyde dehydrogenase	Acetaldehyde dehydrogenase, Aldehyde dehydrogenase	Acetaldehyde dehydrogenase, Aldehyde dehydrogenase
		xylG	2-Hydroxymuconic semialdehyde dehydrogenase	2-Hydroxymuconic semialdehyde dehydrogenase, 2-hydroxymuconate-6-semialdehyde dehydrogenase	2-Hydroxymuconic semialdehyde dehydrogenase, 2-hydroxymuconate-6-semialdehyde dehydrogenase
		dmpC	2-Hydroxymuconic semialdehyde dehydrogenase	2-Hydroxymuconic semialdehyde dehydrogenase, 2-hydroxymuconate-6-semialdehyde dehydrogenase	2-Hydroxymuconic semialdehyde dehydrogenase, 2-hydroxymuconate-6-semialdehyde dehydrogenase
		dmpl	-	phenol/toluene 2-monooxygenase, phenol hydroxylase	phenol/toluene 2-monooxygenase, phenol hydroxylase
		xylI	4-Oxalocrotonoate decarboxylase	2-oxo-3-hexenedioate decarboxylase	2-oxo-3-hexenedioate decarboxylase
		DmpH	4-Oxalocrotonoate decarboxylase	2-oxo-3-hexenedioate decarboxylase	2-oxo-3-hexenedioate decarboxylase
	Protocatechuate	PraA	Protocatechuate 2,3-dioxygenase	3,4-dihydroxyphenylacetate 2,3-dioxygenase	3,4-dihydroxyphenylacetate 2,3-dioxygenase
		PraH	5-Carboxy-2-hydroxymuconate-6-semialdehyde decarboxylase	aminocarboxymuconate-semialdehyde decarboxylase, 5-Carboxy-2-hydroxymuconate-6-semialdehyde decarboxylase	-
		PraB	2-Hydroxymuconate-6-semialdehyde dehydrogenase	-	-
		PraC	4-Oxalocrotonate tautomerase	2-hydroxymuconate tautomerase, 4-Oxalocrotonate tautomerase	2-hydroxymuconate tautomerase, 4-Oxalocrotonate tautomerase
		PraD	4-Oxalocrotonate decarboxylase	2-keto-4-pentenoate hydratase, 2-oxo-3-hexenedioate decarboxylase	2-keto-4-pentenoate hydratase, 2-oxo-3-hexenedioate decarboxylase
		PraE	2-Oxopent-4-enoate hydratase	2-keto-4-pentenoate hydratase, 2-oxopent-4-enoate hydratase	2-oxopent-4-enoate hydratase, 2-oxopent-4-enoate hydratase
		PraG	Acetaldehyde dehydrogenase	-	-
		PcaB	3-carboxy-cis,cis-muconate cycloisomerase	3-carboxy-cis,cis-muconate cycloisomerase	-
		PcaC	4-carboxymuconolactone	4-carboxymuconolactone decarboxylase	-
		PcaD	3-oxoadipate enol-lactonase	3-oxoadipate enol-lactonase	-
		PcaG	protocatechuate 3, 4-dioxygenase	protocatechuate 3,4-dioxygenase	-
		PcaH,pcaH2	protocatechuate 3, 4-dioxygenase	protocatechuate 3,4-dioxygenase	-
	ß-ketoadipate	PcaI	3-oxoadipate CoA-transferase subunit A	-	-
		PcaJ	3-oxoadipate CoA-transferase subunit B	-	-
		PcaF,pcaF1	4-hydroxy-2-oxovalerate aldolase	4-hydroxy-2-oxovalerate aldolase	3-oxoadipyl-CoA thiolase
	Benzoic acid	BenA	-	-	-
		BenB	-	-	-
		BenC	-	-	-
		BenE	-	-	-
		BenD	-	-	-
		PobA	4-Hydroxybenzoate-3-monooxygenase	p-hydroxybenzoate 3-monooxygenase	-
	Syringate	VanA,vanB	vanillic acid O-demethylase oxygenase	-	Vancomycin Teicoplanin A-type resistance protein
					D-alanine--D-alanine ligase
					D-alanine--D-alanine ligase, vanillate demethylase oxygenase subunit A
					D-alanine--(R)-lactate ligase
					vanillate demethylase oxygenase subunit A
					vanillate O-demethylase oxidoreductase,
					D-alanine--(R)-lactate ligase
					D-alanine--(R)-lactate ligase
					Vancomycin B-type resistance protein
		DesA,LigH	syringate O-demethylase	syringate O-demethylase	lysine decarboxylase
					delta-9 fatty acid desaturase
		LigM	vanillate/3-O-methylgallic acid	vanillate/3-O-methylgallate O-demethylase	vanillate/3-O-methylgallate O-demethylase
		DmtS	O-demethylase	-	-
		DesV	Syringaldehyde dehydrogenase	dTDP-3-amino-3,4,6-trideoxy-alpha-D-glucose transaminase	-
		LigV	vanillin dehydrogenase	benzaldehyde dehydrogenase, vanillin dehydrogenase	AP/deoxyribose 5'-phosphate (5'-dRP)-lyase, ATP-dependent DNA ligase subunit Ku
		GalD	4-Oxalomesaconate keto-enol tautomerase	4-oxalomesaconate tautomerase, 4-oxalomesaconate tautomerase	beta-galactosidase
		GalB	4-Oxalomesaconate enol hydratase	4-oxalomesaconate hydratase , 4-oxalmesaconate hydratase	beta-galactosidase
		GalC	4-Carboxy-4-hydroxy-2-oxoadipate aldolase	galactosylceramidase	galactosylceramidase
		LigAB/DesZ/LigA2B2	ring-cleavage dioxygenases	-	protocatechuic acid 4,5-dioxygenase α and β subunit
					aromatic ring-opening dioxygenase α and β subunit
					3MGA 3,4-dioxygenase
		DesC and DesD		-	CHMOD methylesterase
		DesB/GalA	-	-	gallic acid dioxygenase
		LigI	2-Pyrone-4,6-dicarboxylate hydrolase	-	-
		LigU	4-Oxalomesaconate delta isomerase	(4E)-oxalomesaconate Delta-isomerase	-
		LigJ	4-Oxalomesaconate hydratase	2-keto-4-carboxy-3-hexenedioate hydratase	4-oxalomesaconate hydratase
		LigK	4-Carboxy-4-hydroxy-2-oxoadipate aldolase/Oxaloacetate decarboxylase	4-hydroxy-4-methyl-2-oxoglutarate aldolase, 4-carboxy-4-hydroxy-2-oxoadipate aldolase/oxaloacetate decarboxylase	4-carboxy-4-hydroxy-2-oxoadipate aldolase/oxaloacetate decarboxylase
		LigC	4-Carboxy-2-hydroxymuconate-6-semialdehyde dehydrogenase	2-hydroxy-4-carboxymuconate semialdehyde hemiacetal dehydrogenase, 4-Carboxy-2-hydroxymuconate-6-semialdehyde dehydrogenase	polydeoxyribonucleotide synthase
