# Supplementary material
Source: Royal Society of Chemistry journal article supplement (doi:10.1039/d6gc01067a)
Supplement: d6gc01067a3.xlsx [file d6gc01067a3.xlsx]

## Sheet: Sheet1
Supplementary Table 4: Classification of genome-predicted metabolic modules identified in Pseudomonas species, along with their corresponding gene sets.
Metabolic Module	Pseudomonas Species	Module Genes
Biphenyl	Pseudomonas sp. KKS102	bphA1,bphA2,bphA3,bphB,bphC,bphD
	Pseudomonas furukawaii KF707	bphA1,bphA2,bphA3,bphA4,bphB,bphC,bphX1,bphX2,bphX3,bphD
ß-aryl ether	Pseudomonas putida KT2440	ligD,ligE,ligF, ligN
Coumaric acid and Ferulic acid	Pseudomonas putida A514	ech, vdh, fcs, aat
	Pseudomonas fluorescens BF13	ech, fcs, aat, vdh
	Pseudomonas putida KT2440	fcs,ech, vanAB
Protocatechuate and ß-ketoadipate	Pseudomonas sp. CCOS 191	pcaB,pcaC,pcaD,pcaF1,pcaG,pcaH
	Pseudomonas putida KT2440	pcaB, pcaC,pcaD,pcaH,pcaG
	Pseudomonas protegens CHA0	pcaB,pcaC,pcaD,pcaF,pcaG,pcaH2
	Pseudomonas putida PRS2000	pcaB,pcaC,pcaD,pcaE,pcaF,pcaI,pcaJ
	Pseudomonas sp. Hu109A	pcaH,pcaG, pcaB,pcaC,pcaD,pcaF
	Pseudomonas putida A514	pcaH, pcaB,pcaC,pcaD, pcaI,pcaJ,pcaF
Catechol	Pseudomonas protegens CHA0	catA, catB, catC
	Pseudomonas putida KT2440	catA, catB, catC
	Pseudomonas chlororaphis NCTC10686	catA,catB,catC
	Pseudomonas sp. CA10	catA,catB, catC
	Pseudomonas putida PRS1	catA,catB, catC
	Pseudomonas sp. Hu109A	catA,catB,catC
	Pseudomonas reinekei MT1	catA, catB, catC
	Pseudomonas sp.	catA,catB,catC
	Pseudomonas putida A514	catA,catB
Benzoic acid	Pseudomonas putida PRS2000	PobA
	Pseudomonas sp. Hu109A	pobA,benA,benb,benC,benD
Syringate	Pseudomonas putida A514	vanA,vanB, DesA, LigM,LigAB
