# Supplementary material
Source: Royal Society of Chemistry journal article supplement (doi:10.1039/d6gc01067a)
Supplement: d6gc01067a4.xlsx [file d6gc01067a4.xlsx]

## Sheet: Sheet1
Supplementary Table 3: Genome–module matrix showing completeness and co-occurrence scoring of lignin-derived aromatic degradation pathways in Pseudomonas species; Highlighted yellow =Reported, Blue -Non-reported.
Genome-module completeness matrix (1 = 100% complete; 0.8 = 80% partial; A = less than 80% or not)														Co-occurrence score (Σ module completeness with ≥80% + 0.5 × co-occurrence)
Sr. No	Species	Temperature °C	pH	Habitat	Biphenyl	ß-aryl ether	Ferulic acid	Coumaric acid	Benzoic acid	Catechol	Protocatechuate	ß-ketoadipate	Syringate	Co-occurrence (≥80% completeness)	Final Score
1	Pseudomonas putida KF715	30-35	7	Contaminated soil	0.8	A	A	A	A	A	A	A	A	0	0
2	Pseudomonas putida B6-2	28-30	6_8	Soil	0.8	A	A	A	A	A	A	A	A	0	0
3	Pseudomonas putida LACPHL-BACT-2023-00015	-	-	Human urine	0.8	A	A	A	A	A	A	A	A	0	0
4	Pseudomonas sp. Cam-1	22		-	0.8	A	A	A	A	A	A	A	A	0	0
5	Pseudomonas citronellolis P3B5	37	7.5	Arctic soil	0.8	A	A	A	A	A	A	A	A	0	0
6	Pseudomonas putida pKF715A	-	-	Biphenyl-contaminated soil	0.8	A	A	A	A	A	A	A	A	0	0
7	Pseudomonas pseudoalcaligenes KF707	-	-	Biphenyl-contaminated soil	0.8	A	A	A	A	A	A	A	A	0	0
8	Pseudomonas aeruginosa JP-11	37	7.5	Marin water	0.8	A	A	A	A	A	A	A	A	0	0
9	Pseudomonas sp. Hu109A	37	6.5	Termite gut	A	A	A	A	A	1	1	1	A	3	4.5
10	Pseudomonas paucimobilis Q1	30-37	7_8	Soil	0.8	A	A	A	A	P	A	A	A	0	0
11	Pseudomonas putida KF703	15-35	7_8	Biphenyl-contaminated soil	0.8	A	A	A	A	0	A	A	A	0	0
12	Pseudomonas sp. LB400	28-30	8	Soil	0.8	A	A	A	A	0	A	A	A	0	0
13	Pseudomonas sp. LD002	30	7	Soil	0.8	A	A	A	A	0	A	A	A	0	0
14	Pseudomonas putida FK2	28	7.5	Soil	A	0.8	A	A	0.8	0	A	A	A	0	0
15	Pseudomonas sp. YS-1p	25	7.5	Decaying wood from thermal pond	A	0.8	A	A	A	0	0.8	A	0.8	0	0
16	Pseudomonas sp. strain Q18	37	7.5	Rotten wood	A	0.8	A	A	A	0	A	A	A	0	0
17	Pseudomonas paucimoblilis TMY1009	26.5	7.5	Contaminated water	A	0.8	0.8	0.8	A	0	A	A	A	0	0
18	Pseudomonas acidovorans	30	7	Soil	A	0.8	0.8	A	A	0	A	0.8	A	0	0
19	Pseudomonas fluorescens AN103	25-30	7-7.5	Soil	A	A	0.8	A	A	0	A	0.8	A	0	0
20	Pseudomonas putida strain E41	25-30	7-7.5	Arctic soil	A	A	A	A	0.8	0.8	A	0.8	A	0	0
21	Pseudomonas syringae isolate CFBP3840	28-30	6-7.5		A	A	A	A	0.8	A	0.8	0.8	A	0	0
22	Pseudomonas cerasi isolate PL963	28-30	7-7.5	Wood	A	A	A	A	0.8	A	A	0.8	A	0	0
23	Pseudomonas syringae pv. cerasicola isolate CFBP6109	18-25	6_7	-	A	A	A	A	A	A	A	0.8	A	0	0
24	Pseudomonas syringae pv. syringae isolate CFBP4215	-	-	Leaf spots	A	A	A	A	A	0.8	0.8	0.8	A	0	0
25	Pseudomonas syringae pv. cerasicola strain CFBP 6110	-	-	Leaf	A	A	A	A	0.8	0.8	0.8	0.8	A	0	0
26	Pseudomonas putida E46	28	7	Agricultural soil	A	A	A	A	A	0.8	0.8	A	A	0	0
27	Pseudomonas veronii 1YdBTEX2	30	7-7.5	Contaminated soil	A	A	A	A	0.8	A	0.8	A	A	0	0
28	Pseudomonas putida NX-1	30	7.1	Soil	A	A	A	A	A	A	0.8	A	A	0	0
29	Pseudomonas knackmussii B13	30	7	Soil	A	A	A	A	0.8	0.8	0.8	A	A	0	0
30	Pseudomonas fluorescens JCM5963	25-30	6_7	Pre-filter tanks	A	A	0.8	A	A	0	A	A	A	0	0
31	Pseudomonas mira	28	7		A	A	0.8	A	A	0	A	A	A	0	0
32	Pseudomonas putida FDAARGOS_409 pRIID_114	25-30	6.5-7.5	Human	A	A	A	A	A	0.8	A	A	A	0	0
33	Pseudomonas syringae group genomosp. 3 isolate CFBP6411	25	-	-	A	A	A	A	A	0.8	A	A	A	0	0
34	Pseudomonas syringae CFBP 2116	-	-	Soil	A	A	A	A	A	0.8	A	A	A	0	0
35	Pseudomonas putida LLC-1	30	7	Soil	A	A	A	A	0.8	0.8	A	A	A	0	0
36	Pseudomonas putida mt-2-6	30	6.8	-	A	A	A	A	A	0.8	A	A	A	0	0
37	Pseudomonas sp. CF600	28-30	7-7.4	Soil	A	A	A	A	A	0.8	A	A	A	0	0
38	Pseudomonas putida WCS358	30	7.4-7.5	-	A	A	0.8	A	A	A	A	A	A	0	0
39	Pseudomonas sp. SG-MS2	28	7.2	Soil	A	A	A	0.8	A	A	A	A	A	0	0
40	Pseudomonas putida 1290	25-30	6-7.5	Vegetation	A	A	A	A	A	A	0.8	0.8	A	0	0
41	Pseudomonas putida B1	25-30	7-7.5	Soil	A	A	A	A	A	A	0.8	0.8	A	0	0
42	Pseudomonas putida B4	30	6.5	Water, soil	A	A	A	A	A	A	0.8	0.8	A	0	0
43	Pseudomonas putida FDAARGOS_376 pCNH_806	-	-	Human	A	A	A	A	0.8	A	A	A	A	0	0
44	Pseudomonas syringae pv. avii isolate CFBP3846	12_25	5-6.5	Plants	A	A	A	A	0.8	A	A	A	A	0	0
45	Pseudomonas sp. strain DJ-12	30	7	Contaminated waste water	A	A	A	A	0.8	A	A	A	A	0	0
46	Pseudomonas multivorans	37	6.5	Soil, water	0.8	A	A	A	A	A	A	A	A	0	0
47	Pseudomonas sp. HR199	26-30	6_10	-	A	0.8	0.8	A	A	A	A	A	A	0	0
48	Pseudomonas putida TMC	30	7.1	River sediment	A	A	A	A	A	A	A	A	0.8	0	0
49	Pseudomonas putida KT2440	30	7	Soil	1	A	1	1	A	1	1	1	A	6	9
50	Pseudomonas furukwaii KF707	30-37	6-7	Biphenyl polluted Soil	1	A	A	A	A	A	A	A	A	1	1.5
51	Pseudomonas putida PRS2000	30	6.8-7	Soil	A	A	A	A	1	A	1	1	A	3	4.5
52	Pseudomonas sp. CA10	30	7	Soil	A	A	A	A	A	1	A	A	A	1	1.5
53	Pseudomonas chloroaphsis NCTC10686	25-30	6.5-7.5	Soil	A	A	A	A	A	1	A	A	A	1	1.5
54	Pseudomonas reinekei MT1	30	7_7.5	Soil	A	A	A	A	A	1	A	A	A	1	1.5
55	Pseudomonas sp.	-	-	Pulp mill effluent	A	A	A	A	A	1	A	A	A	1	1.5
56	Pseudomonas fluorescens BF13	30	6.1-8.0	Soil	A	A	1	A	A	A	A	A	A	1	1.5
57	Pseudomonas paucimobilis SYK-6	28-30	6.5-7.5	Soil	0.8	A	A	A	A	A	A	A	A	0	0
58	Pseudomonas sp. CCOS 191	25-30	6_7	Human	A	A	A	A	A	A	1	1	A	2	3
59	Pseudomonas protegens CHA0	28-30	7	Soil	A	A	A	A	A	1	A	1	A	2	3
60	Pseudomonas sp. KKS102	30	7.5	Biphenyl polluted Soil	1	A	A	A	A	A	A	A	A	1	1.5
61	Pseudomonas putida A514	30	7	Vegetation (potato)	A	A	1	1	A	1	1	A	1	5	7.5
62	Pseudomonas putida PRS1	-	-		A	A	A	A	A	1	A	A	A	1	1.5
63	Pseudomonas sp. NCIMB 10643	-	-	Soil	0.8	A	A	A	A	A	A	A	A	1	0
64	Pseudomonas fluorescens isolate PS861	-	-	Soil	0.8	A	A	A	A	A	A	A	A	1	0
65	Pseudomonas fluorescens isolate PS647	-	-	Soil	0.8	A	A	A	A	A	A	A	A	1	0
66	Pseudomonas aeruginosa KF702	-	-	-	0.8	A	A	A	A	A	A	A	A	1	0
